# Supplementary material for: Leptomeningeal Cells Induce Synaptic Failure via Cathepsin B-mediated IL-1ß Production after Porphyromonas Gingivalis Infection
Source: Research Square preprint supplement (doi:10.21203/rs.3.rs-104469/v1), 2020-11-13

**Additional file 1**: Figure S1. Propolis modulated NLRP3 and Caspase-1 expression in the *P.*

*gingivalis* infected leptomeningeal cells.


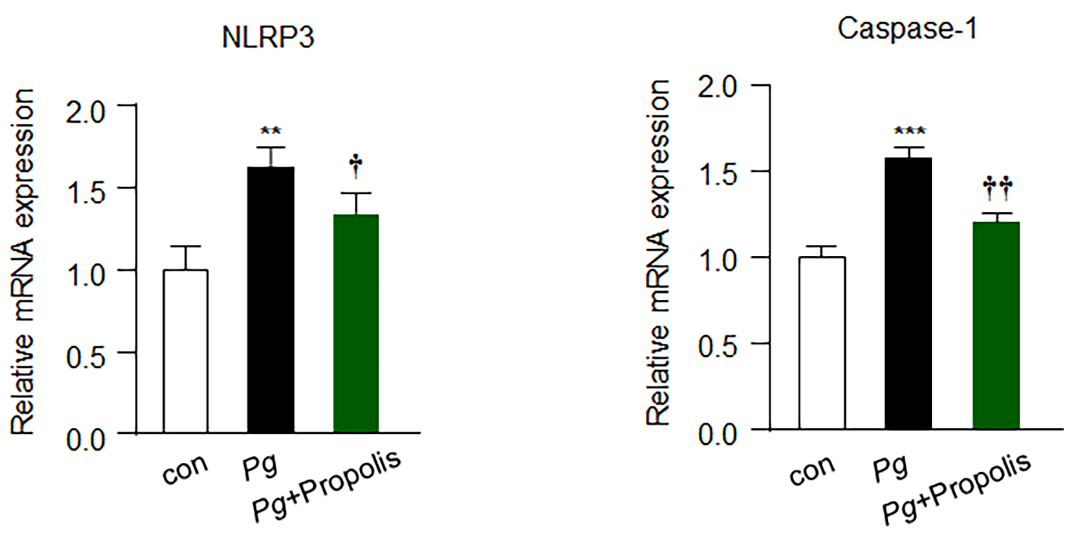

Supplement: Supplementary file 1 [file 47df2b9901d9216e8b8a3496.docx]
