# Supplementary material for: Leptomeningeal Cells Induce Synaptic Failure via Cathepsin B-mediated IL-1ß Production after Porphyromonas Gingivalis Infection
Source: Research Square preprint supplement (doi:10.21203/rs.3.rs-104469/v1), 2020-11-13

**Additional file 2**: Figure S2. Propolis modulated NLRP3 and Caspase-1 expression positive

correlated with CatB mRNA expression in the *P. gingivalis* infected leptomeningeal cells.


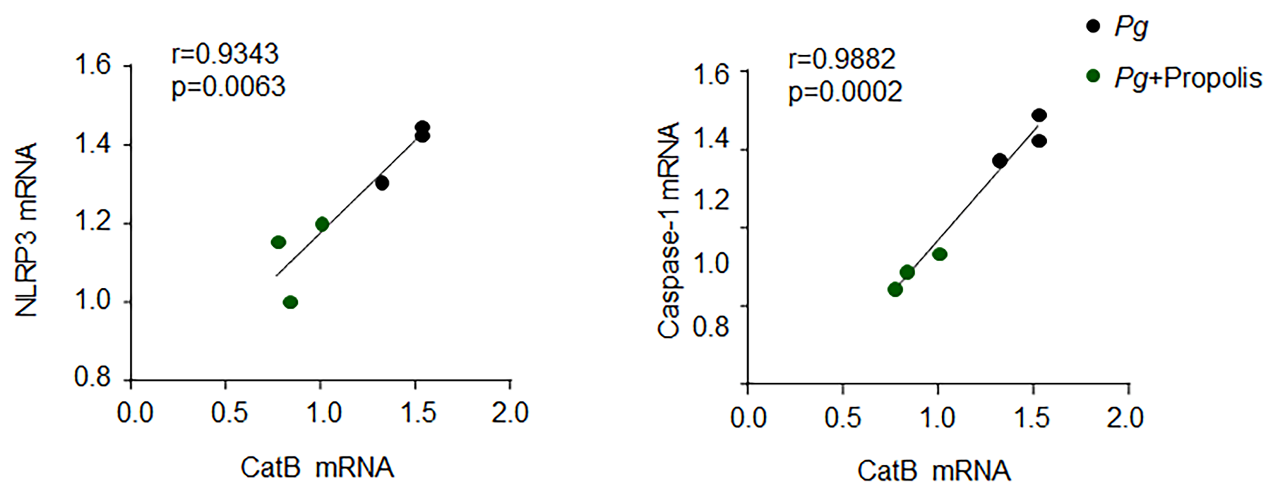

Supplement: Supplementary file 2 [file 8ab0d5ad0ce2e0b8061b2887.docx]
